# Supplementary material
Source: PubMed Central journal article supplement (PMC3918434)

Supplementary Figure S3. Plots of gene expression for transcripts with significant *Lx*A effects that exhibit postponed senescence. These transcripts with significant changes in gene expression with age in the B<sub>3</sub> line, but not either of the O lines, which remain at the level of young B<sub>3</sub> flies.

**143603\_i\_at**

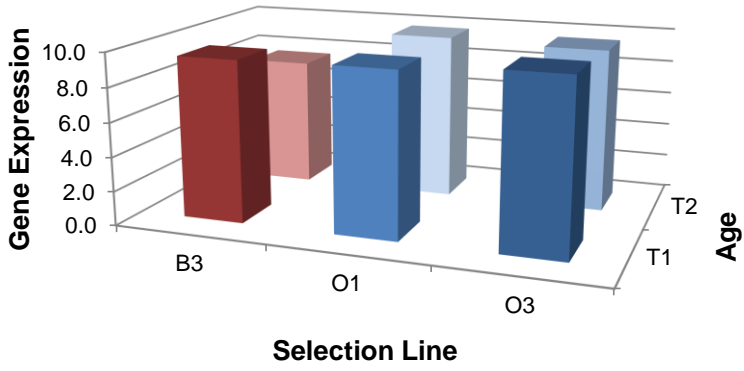

**TepII**

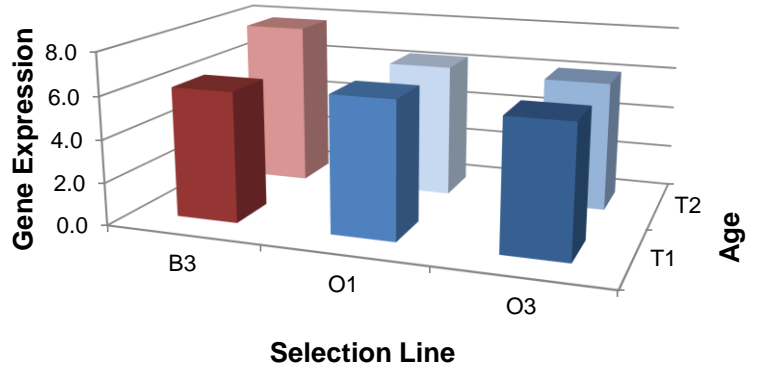

**CG10592**

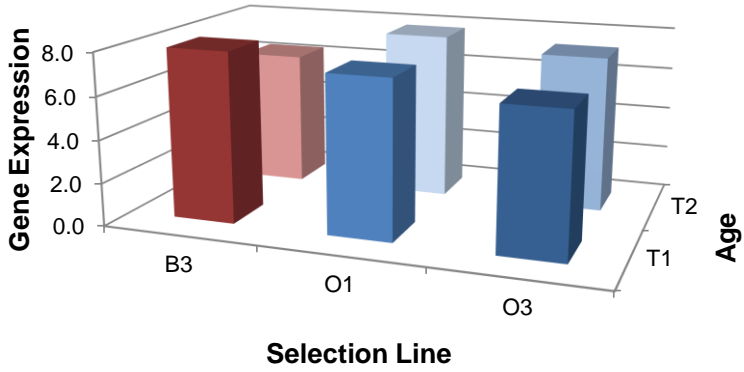

**CG4716**

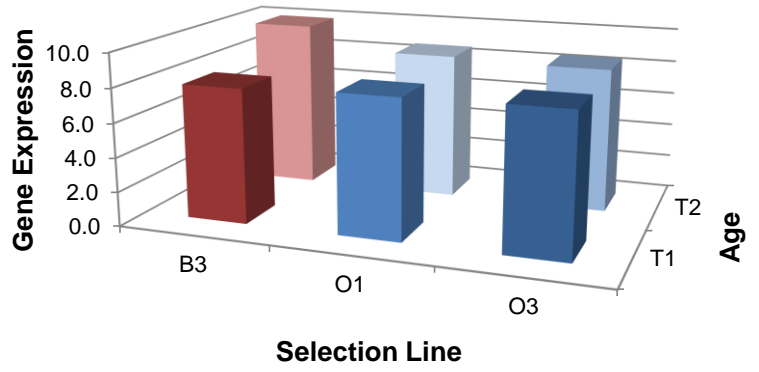

**CG5150**

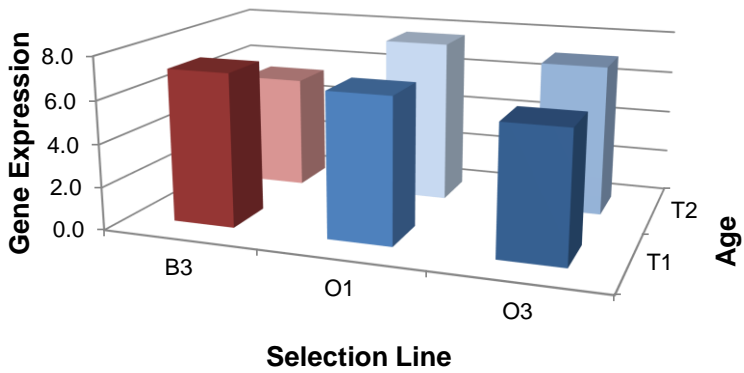

**CG8562**

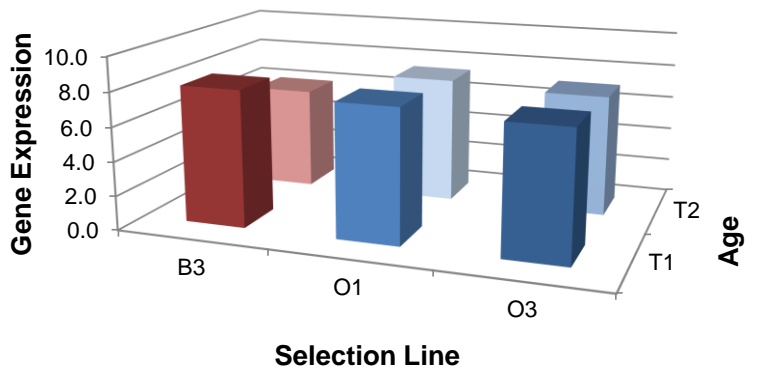

**143604\_r\_at**

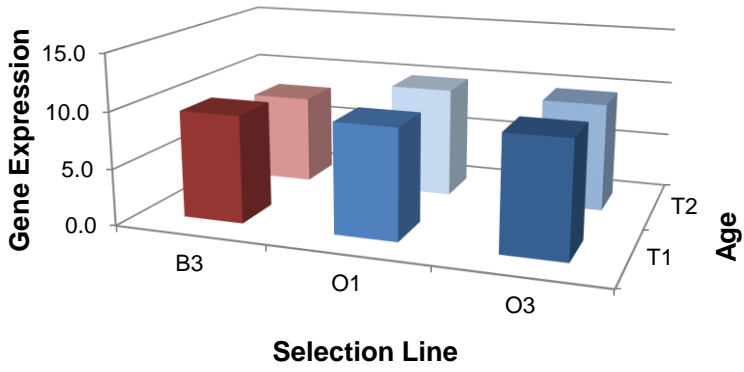

**CG12374**

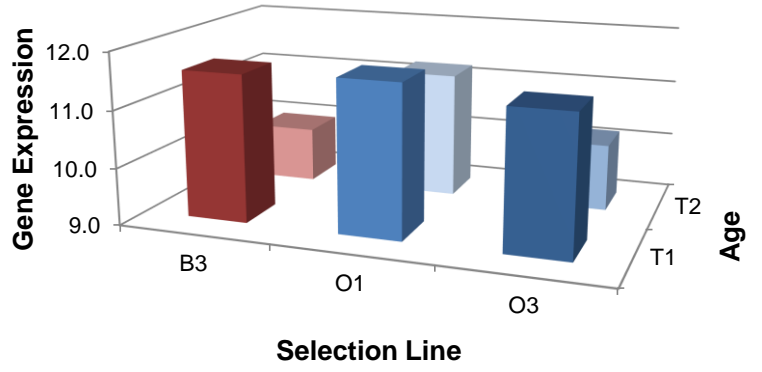

**CG7839**

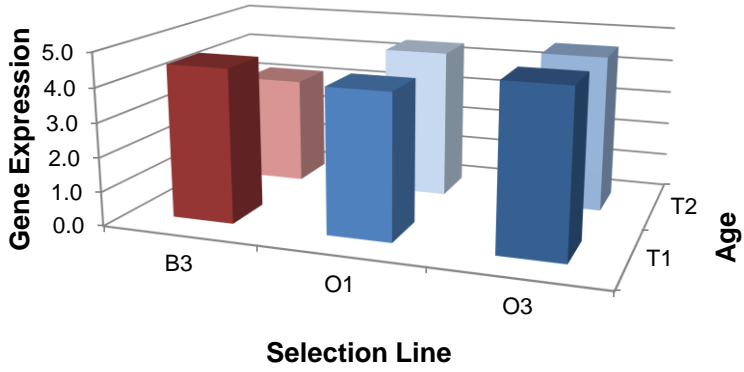

**CG8560**

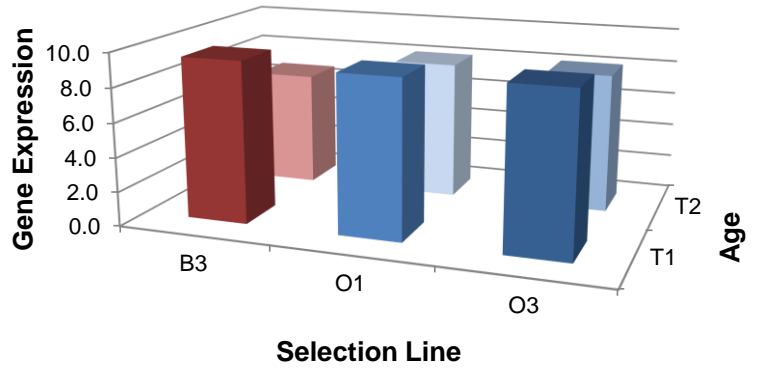

**153367\_at**

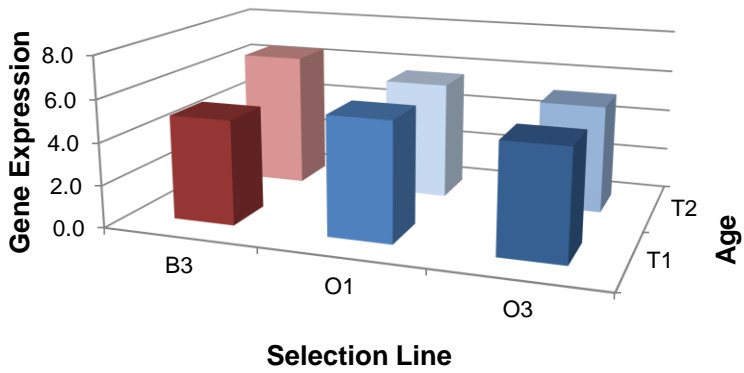

**Jon25Bii**

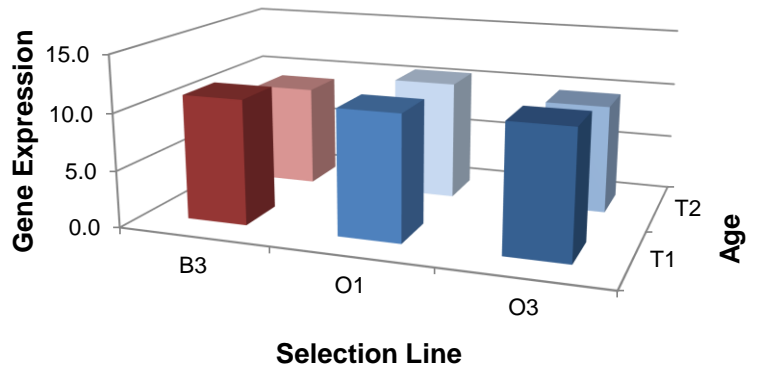

**CG1806**

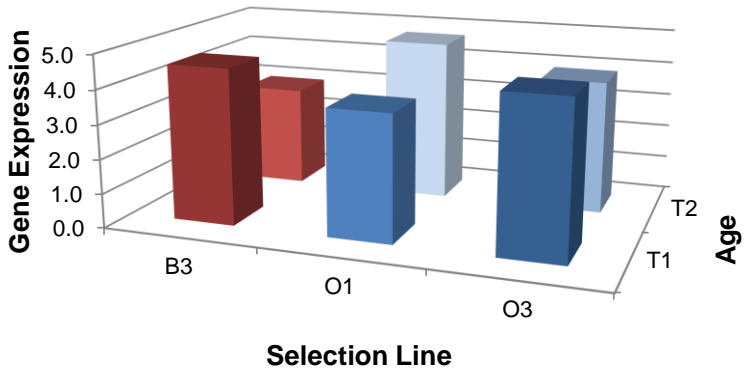

**CG10165**

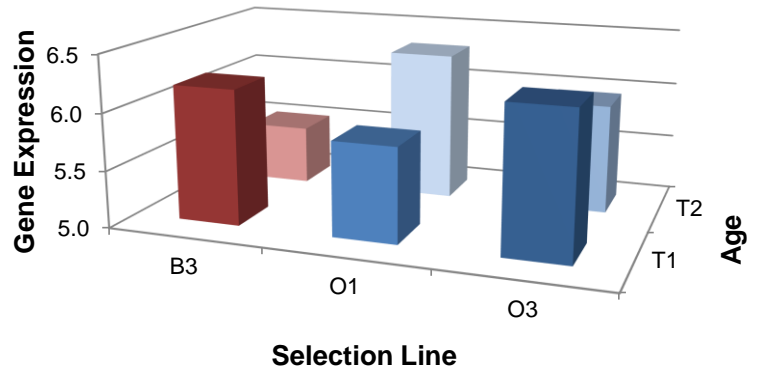

**CG15293**

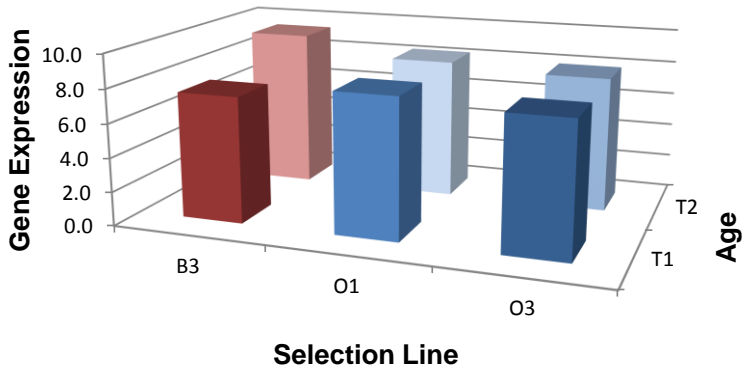

**CG6687**

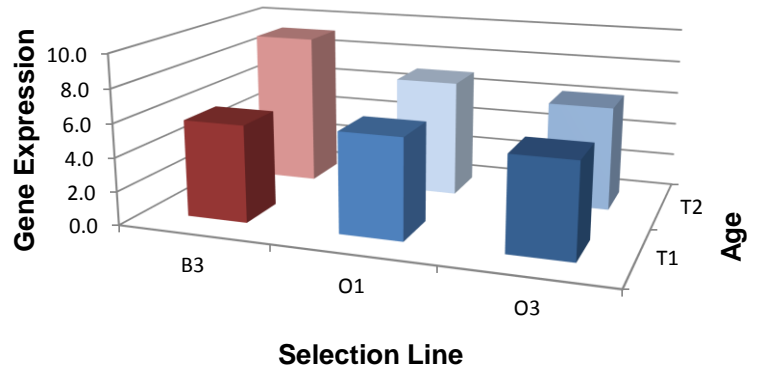

**CG5773**

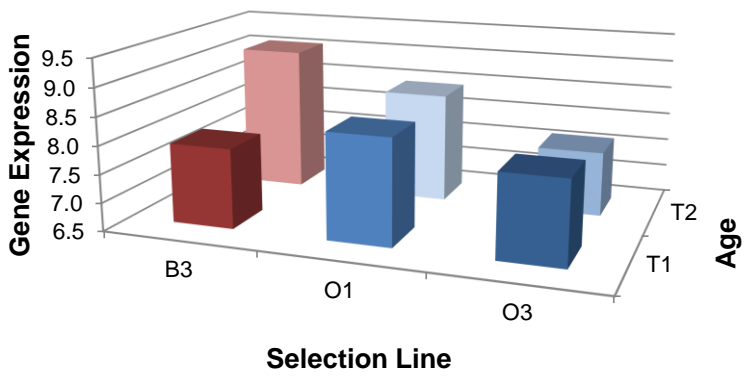

**Bace**

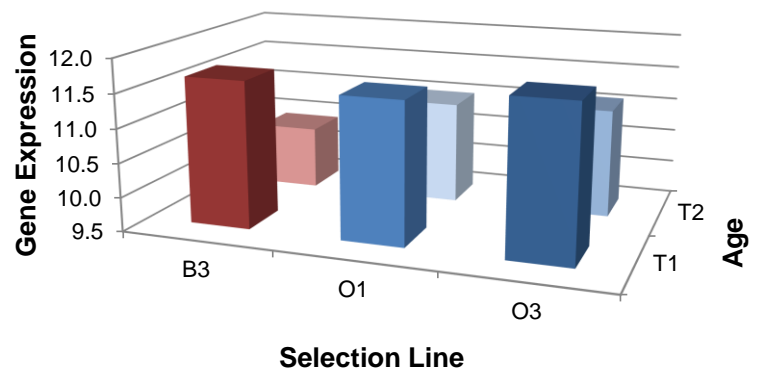

**CG3348**

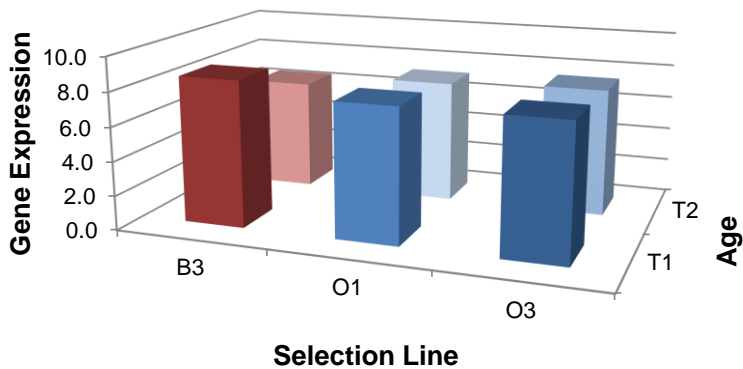

**CG15098**

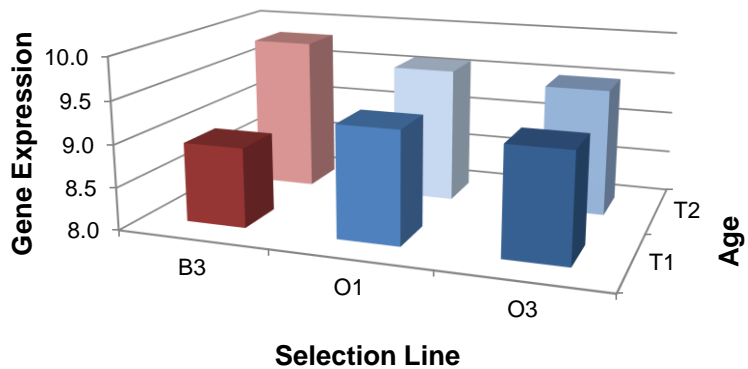

**CG14109**

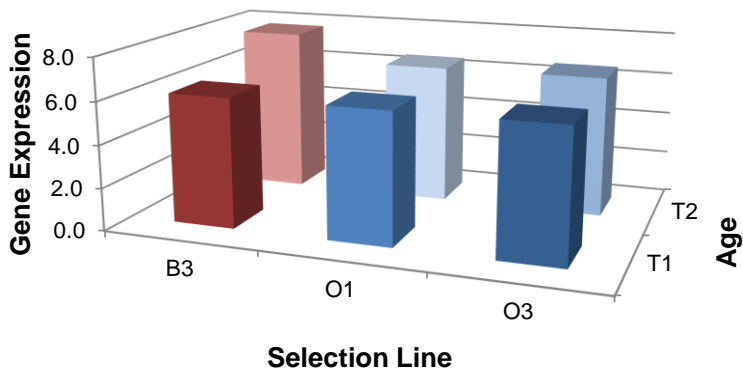

**CG14109**

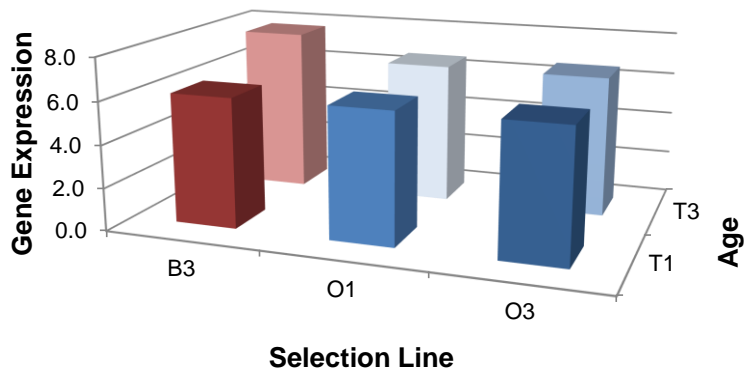

**CG2656**

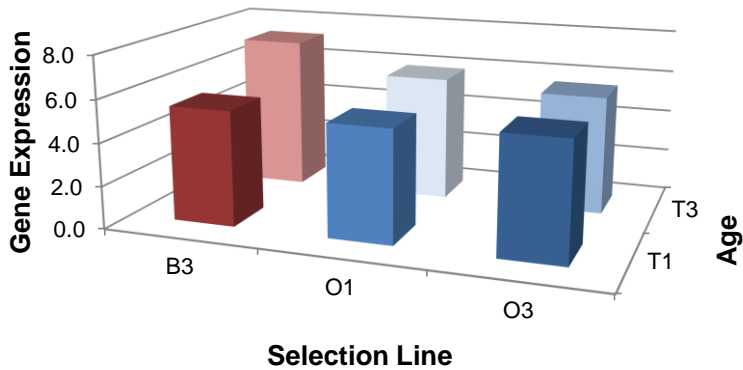

**TepII**

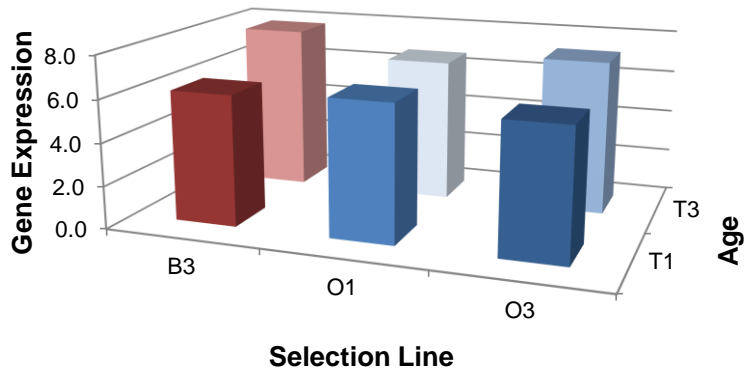

Supplement: NIHMS551358-supplement-Supplementary_Figure_3.pdf [file NIHMS551358-supplement-Supplementary_Figure_3.pdf]
