# Supplementary material
Source: PubMed Central journal article supplement (PMC3918434)

Supplementary Figure S1. Gene Ontology enrichment analysis for over-represented Biological Process categories for probe sets down-regulated with age in the T1, T2 analysis. The colour of the bars denotes the  $P$ -values for significance of enrichment, adjusted for multiple tests using the Benjamini correction. Light blue:  $P < 0.05$ ; Medium blue:  $P < 0.01$ ; Dark blue:  $P < 0.001$ .

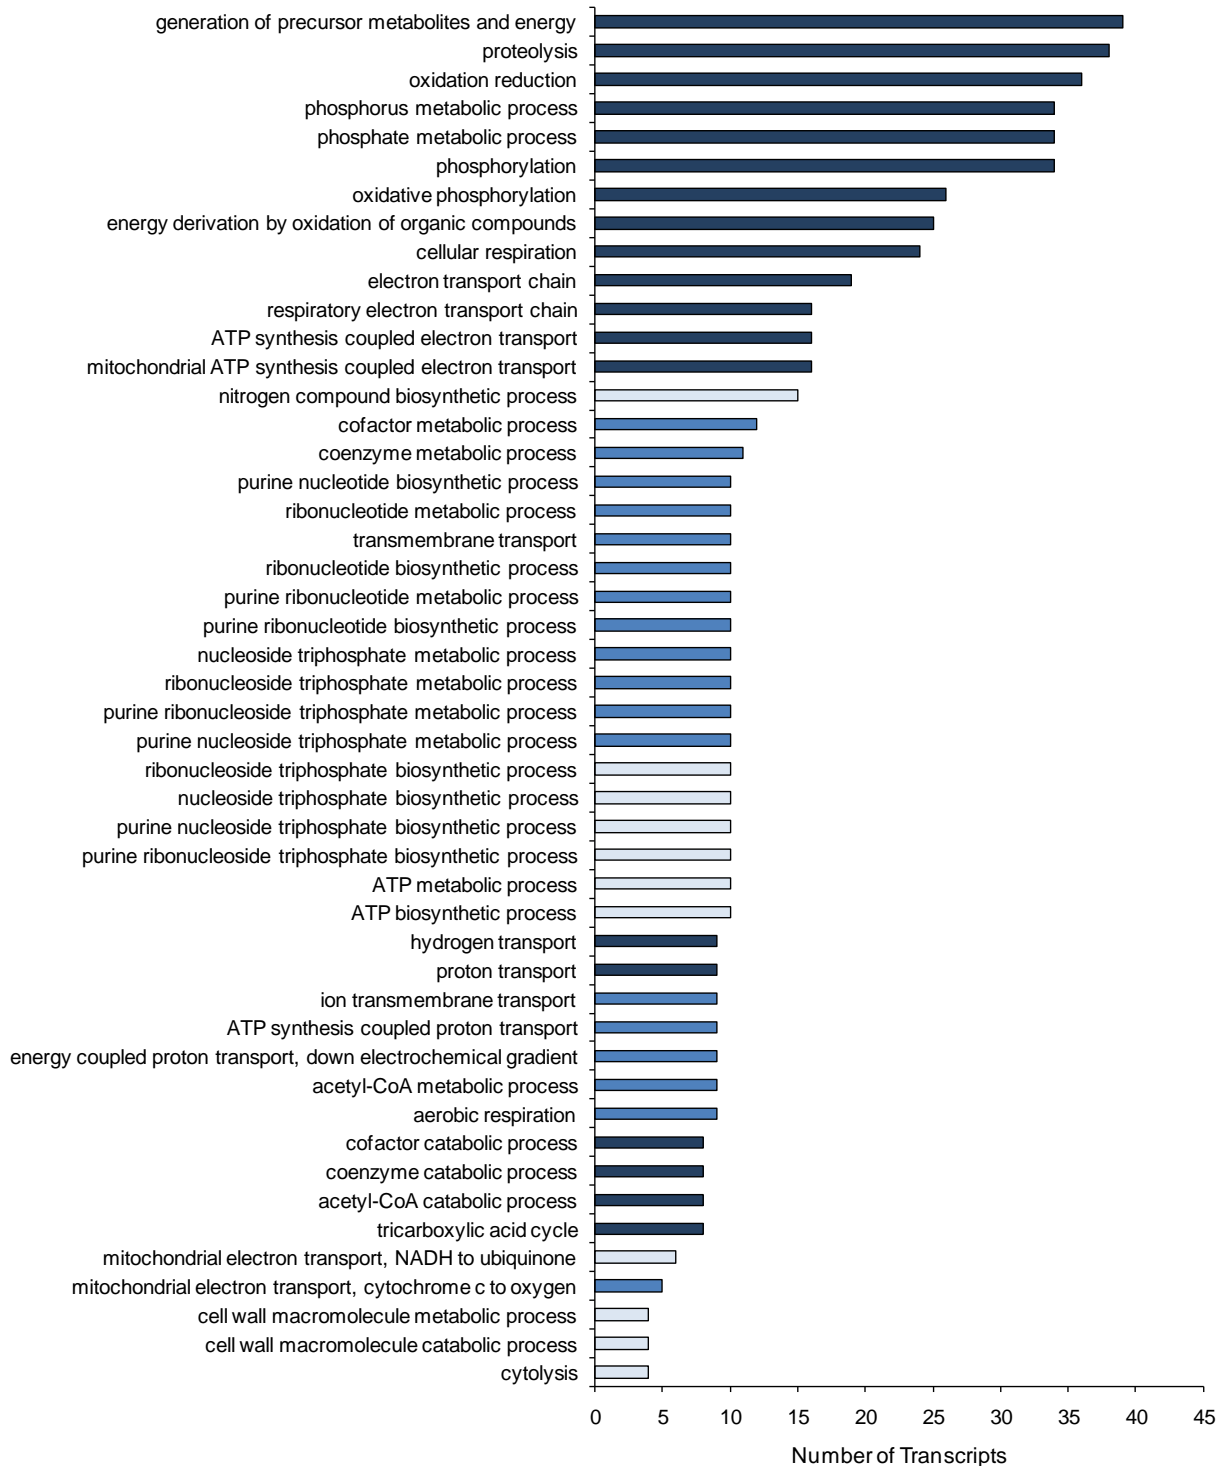

Supplement: NIHMS551358-supplement-Supplementary_Figure_1.pdf [file NIHMS551358-supplement-Supplementary_Figure_1.pdf]
